# Supplementary material for: Common feedstocks of late accretion for the terrestrial planets
Source: Springer Nature journal article supplement (doi:10.1038/s41550-021-01475-0), 2021-09-30
Supplement: 41550_2021_1475_MOESM1_ESM.pdf [file 41550_2021_1475_MOESM1_ESM.pdf]

**Supplementary information**

---

**Common feedstocks of late accretion for the terrestrial planets**

---

In the format provided by the authors and unedited

# Common feedstocks of late accretion for the terrestrial planets

Meng-Hua Zhu<sup>1</sup>, Alessandro Morbidelli<sup>2</sup>, Wladimir Neumann<sup>3,4</sup>, Qing-Zhu Yin<sup>5</sup>, James M. D. Day<sup>6</sup>, David C. Rubie<sup>7</sup>, Gregory J. Archer<sup>8</sup>, Natalia Artemieva<sup>9,10</sup>, Harry Becker<sup>11</sup>, Kai Wünnemann<sup>11,12</sup>

<sup>1</sup>State Key Laboratory of Lunar and Planetary Sciences, Macau University of Science and Technology, Taipa, Macau;

<sup>2</sup>Département Lagrange, University of Nice–Sophia Antipolis, CNRS, Observatoire de la Côte d’Azur, Nice, France;

<sup>3</sup>Klaus-Tschira-Labor für Kosmochemie, Institut für Geowissenschaften, Universität Heidelberg, Heidelberg, Germany;

<sup>4</sup>Institute of Planetary Research, German Aerospace Center (DLR), Berlin, Germany;

<sup>5</sup>Department of Earth and Planetary Sciences, University of California at Davis, Davis, CA 95616, USA;

<sup>6</sup>Scripps Institution of Oceanography, University of California San Diego, La Jolla, California 92093, USA;

<sup>7</sup>Bayerisches Geoinstitut, University of Bayreuth, Bayreuth, Germany;

<sup>8</sup>Institut für Planetologie, University of Münster, Münster, Germany;

<sup>9</sup>Planetary Science Institute, Tucson, USA;

<sup>10</sup>Institute for Dynamics of Geospheres RAS, Moscow, Russia;

<sup>11</sup>Institute of Geological Sciences, Planetary Sciences and Remote Sensing, Freie Universität Berlin, Berlin, Germany;

<sup>12</sup>Museum für Naturkunde, Berlin, Germany

---

## Supplementary Figures 1 | Various parameters used for iSALE-3D simulations

### Model parameters

|                                    |          |
|------------------------------------|----------|
| Cells per projectile radius (CPPR) | 20       |
| Gravity (m/s <sup>2</sup> )        | 0.22     |
| Mantle thickness (km)              | 170      |
| Core radius (km)                   | 110      |
| Impact velocity (km/s)             | 3; 5; 10 |
| Impactor diameter (km)             | 1- 64    |

| Description                                             | target mantle & impactor | target core |
|---------------------------------------------------------|--------------------------|-------------|
| Equation of state                                       | Dunite ANEOS*            | Iron ANEOS† |
| Melt temperature at zero pressure (K)                   | 1373‡                    | 1,811§      |
| Constant in thermal softening law                       | 2.0‡                     | 2.0§        |
| Constant in Simon approximation (GPa)                   | 1.4‡                     | 107§        |
| Exponent in Simon approximation                         | 5.0‡                     | 1.76§       |
| Poisson's ratio                                         | 0.25                     | 0.30§       |
| Cohesion (damaged) (MPa)                                | 0.01¶                    | -           |
| Coefficient of internal friction for material (damaged) | 0.6¶                     | -           |
| Limiting strength at high pressure (damaged) (GPa)      | 3.5¶                     | -           |
| Cohesion (intact) (MPa)                                 | 50¶                      | 100§        |
| Coefficient of internal friction for material (intact)  | 1.5¶                     | -           |
| Limiting strength at high pressure (intact) (GPa)       | 3.5¶                     | -           |

\* See *ref.* 128;

† See *ref.* 104;

‡ See *ref.* 107;

¶ See *refs.* 103, 129 and *references therein* for a description of the strength model parameters and their implementation in iSALE;

§ See *ref.* 103 and *references therein* for a description of the strength model parameters and their implementation in iSALE.
